# Supplementary material for: Improving variant calling using population data and deep learning
Source: PubMed Central journal article supplement (PMC10182612; doi:10.1186/s12859-023-05294-0), 2023-05-12
Supplement: 12859_2023_5294_MOESM1_ESM.pdf [file 12859_2023_5294_MOESM1_ESM.pdf]

# Supplementary Information for: Improving variant calling using population data and deep learning

Nae-Chyun Chen<sup>1, ‡, \*</sup>, Alexey Kolesnikov<sup>2</sup>, Sidharth Goel<sup>2</sup>,  
Taedong Yun<sup>2</sup>, Pi-Chuan Chang<sup>2, †</sup>, and Andrew Carroll<sup>2, †, \*</sup>

<sup>1</sup>Department of Computer Science, Johns Hopkins University,  
Baltimore, MD 21218, USA

<sup>2</sup>Google Health, Palo Alto, CA 94304 and Cambridge, MA 02142,  
USA

*corresponding author: cnaechy1@jhu.edu;*  
*awcarroll@google.com*

<sup>†</sup>These authors contributed equally to this work.

<sup>‡</sup>Work performed while an intern at Google Health.

March 30, 2023

## Supplementary Notes

### S1 Performance on zero-frequency variants

A potential concern for population-aware variant calling models is increasing false negative rate for novel alleles. Since it is not trivial to define a set of truly novel variants in the 1000 Genomes Project, we extracted variants with zero allele frequency to investigate the impact when population information is included in a variant calling model. Using the GIAB v4.2.1 truth set, there are 32,256 (1.0%) SNPs and 3,193 (0.6%) indels that have zero allele frequency for sample HG003. We then use the zero-frequency variant set to evaluate recall of actual variant calls using hap.py<sup>1</sup>.

We observed that the recall on zero-frequency variants underperforms the rest using all DeepVariant models, regardless of variant types and whether to utilize population information (Figure S1). With 35x reads, the recall of the population-agnostic DeepVariant model (DeepVariant) is 0.8938 for SNPs and 0.7337 for indels. The recall further decreases to 0.8813 for SNPs and 0.7142 for indels when using DeepVariant-AF. When using 21x reads, the drop in accuracy gets larger for both types of variants. This is consistent with our analysis that the population-aware DeepVariant model requires stronger evidence

(higher-quality pileup images) to call zero-frequency variants, thus reducing recall. Further, the population information has a stronger influence in variant calling for low-coverage datasets. Despite the disadvantages, the negative impact on zero-frequency variants is small compared to overall error reduction.

To better understand the zero-frequency variants, we called variants using the DeepVariant PacBio model with the PrecisionFDA v2 35x HG003 reads set sequenced with the PacBio HiFi technology<sup>2</sup>. The recall for the zero-frequency variants improves to 0.9519 for SNPs and 0.9132 for indels. The large difference in recall/FNR indicates that many of the zero-frequency variants are hard to genotype using Illumina reads, and may not be novel mutations relative to samples in reference panels. In the future, reference panels utilizing high-quality long reads will likely provide better allele frequency estimates and improve the population-aware model performance<sup>3-5</sup>.

## Supplementary Tables

Table S1: Variant calling results for WGS HG003.

| Coverage | Type  | Caller         | Precision | Recall   | F1       |
|----------|-------|----------------|-----------|----------|----------|
| 35x      | INDEL | DeepVariant-AF | 0.994056  | 0.997466 | 0.995758 |
|          |       | DeepVariant    | 0.993992  | 0.997365 | 0.995676 |
|          |       | GATK           | 0.991594  | 0.991121 | 0.991357 |
|          |       | Octopus        | 0.989744  | 0.996324 | 0.993023 |
|          |       | Strelka2       | 0.987627  | 0.995968 | 0.99178  |
|          | SNP   | DeepVariant-AF | 0.993929  | 0.998499 | 0.996208 |
|          |       | DeepVariant    | 0.993824  | 0.998177 | 0.995996 |
|          |       | GATK           | 0.992233  | 0.9884   | 0.990313 |
|          |       | Octopus        | 0.988984  | 0.995357 | 0.99216  |
|          |       | Strelka2       | 0.992187  | 0.981123 | 0.986624 |
| 21x      | INDEL | DeepVariant-AF | 0.984279  | 0.992219 | 0.988233 |
|          |       | DeepVariant    | 0.982706  | 0.991749 | 0.987206 |
|          |       | GATK           | 0.975544  | 0.982909 | 0.979213 |
|          |       | Octopus        | 0.97672   | 0.99065  | 0.983636 |
|          |       | Strelka2       | 0.958601  | 0.989087 | 0.973605 |
|          | SNP   | DeepVariant-AF | 0.991864  | 0.996686 | 0.994269 |
|          |       | DeepVariant    | 0.991698  | 0.996023 | 0.993856 |
|          |       | GATK           | 0.98848   | 0.987216 | 0.987847 |
|          |       | Octopus        | 0.984764  | 0.993798 | 0.989261 |
|          |       | Strelka2       | 0.981011  | 0.992999 | 0.986968 |
| 10x      | INDEL | DeepVariant-AF | 0.889863  | 0.958186 | 0.922762 |
|          |       | DeepVariant    | 0.880882  | 0.953219 | 0.915624 |
|          |       | GATK           | 0.865516  | 0.944581 | 0.903322 |
|          |       | Octopus        | 0.889788  | 0.9577   | 0.922496 |
|          |       | Strelka2       | 0.750313  | 0.96193  | 0.843045 |
|          | SNP   | DeepVariant-AF | 0.952551  | 0.985066 | 0.968536 |
|          |       | DeepVariant    | 0.950283  | 0.978971 | 0.964414 |
|          |       | GATK           | 0.939326  | 0.976279 | 0.957446 |
|          |       | Octopus        | 0.938012  | 0.984203 | 0.960552 |
|          |       | Strelka2       | 0.916328  | 0.976271 | 0.94535  |
| 6x       | INDEL | DeepVariant-AF | 0.72068   | 0.914249 | 0.806005 |
|          |       | DeepVariant    | 0.710767  | 0.902276 | 0.795153 |
|          |       | GATK           | 0.691391  | 0.898816 | 0.781576 |
|          |       | Octopus        | 0.748593  | 0.905851 | 0.819748 |
|          |       | Strelka2       | 0.500348  | 0.935336 | 0.651945 |
|          | SNP   | DeepVariant-AF | 0.82965   | 0.962828 | 0.891292 |
|          |       | DeepVariant    | 0.82624   | 0.948907 | 0.883335 |
|          |       | GATK           | 0.80301   | 0.951194 | 0.870843 |
|          |       | Octopus        | 0.834285  | 0.953795 | 0.890047 |
|          |       | Strelka2       | 0.753403  | 0.917202 | 0.827272 |

Table S2: Variant calling results for WES HG003 (Oslo dataset)

| Type  | Caller         | False negatives | False positives | Recall   | Precision | F1 score |
|-------|----------------|-----------------|-----------------|----------|-----------|----------|
| INDEL | DeepVariant-AF | 56              | 30              | 0.965389 | 0.981343  | 0.973301 |
|       | DeepVariant    | 61              | 35              | 0.962299 | 0.978234  | 0.970201 |
|       | GATK           | 113             | 182             | 0.930161 | 0.893255  | 0.911334 |
|       | Octopus        | 82              | 71              | 0.94932  | 0.956996  | 0.953143 |
|       | Strelka2       | 104             | 80              | 0.935723 | 0.950403  | 0.943006 |
| SNP   | DeepVariant-AF | 270             | 100             | 0.990198 | 0.996347  | 0.993263 |
|       | DeepVariant    | 279             | 112             | 0.989871 | 0.995909  | 0.992881 |
|       | GATK           | 283             | 365             | 0.989726 | 0.986784  | 0.988252 |
|       | Octopus        | 456             | 213             | 0.983445 | 0.99219   | 0.987798 |
|       | Strelka2       | 379             | 138             | 0.98624  | 0.994945  | 0.990574 |

Table S3: Variant calling results for WES HG003 (IDT dataset)

| Type  | Caller         | False negatives | False positives | Recall   | Precision | F1 score |
|-------|----------------|-----------------|-----------------|----------|-----------|----------|
| INDEL | DeepVariant-AF | 28              | 14              | 0.975779 | 0.987952  | 0.981827 |
|       | DeepVariant    | 31              | 21              | 0.973183 | 0.981974  | 0.977559 |
|       | GATK           | 74              | 315             | 0.935986 | 0.780181  | 0.851011 |
|       | Octopus        | 52              | 81              | 0.955017 | 0.933168  | 0.943966 |
|       | Strelka2       | 63              | 143             | 0.945502 | 0.886328  | 0.914959 |
| SNP   | DeepVariant-AF | 258             | 131             | 0.989845 | 0.994818  | 0.992326 |
|       | DeepVariant    | 282             | 135             | 0.988901 | 0.994656  | 0.99177  |
|       | GATK           | 266             | 433             | 0.98953  | 0.98306   | 0.986285 |
|       | Octopus        | 437             | 216             | 0.9828   | 0.991418  | 0.98709  |
|       | Strelka2       | 365             | 141             | 0.985634 | 0.994401  | 0.98999  |

Table S4: Recall for HG003 GIAB v4.2.1 variants that have zero allele frequency in the 1000 Genomes Project. Values in the parentheses in the “Type” column specify the total number of zero-allele-frequency variants for each variant type

| Type          | DeepVariant-AF | DeepVariant | GATK     | Octopus  | Strelka2 |
|---------------|----------------|-------------|----------|----------|----------|
| INDEL (1,592) | 0.714196       | 0.733668    | 0.837312 | 0.789573 | 0.739322 |
| SNP (1,365)   | 0.881319       | 0.893773    | 0.898168 | 0.882051 | 0.890842 |

Table S5: Variant calling accuracy on common (allele frequency  $> 0.01$ ) variants.

Dataset: HG003 35x WGS

| Type  | Caller         | False negatives | False positives | Recall   | Precision | F1 score  |
|-------|----------------|-----------------|-----------------|----------|-----------|-----------|
| INDEL | DeepVariant-AF | 2055            | 1361            | 0.995829 | 0.997351  | 0.9965894 |
|       | DeepVariant    | 2179            | 1345            | 0.995577 | 0.997382  | 0.9964787 |
|       | GATK           | 3465            | 2565            | 0.992967 | 0.994999  | 0.9939820 |
|       | Strelka2       | 5344            | 2104            | 0.989153 | 0.995855  | 0.9924927 |
| SNP   | DeepVariant-AF | 10209           | 4401            | 0.996835 | 0.998634  | 0.9977337 |
|       | DeepVariant    | 10979           | 4415            | 0.996597 | 0.998629  | 0.9976120 |
|       | GATK           | 16202           | 13630           | 0.994978 | 0.995773  | 0.9953753 |
|       | Strelka2       | 29972           | 3925            | 0.990709 | 0.998774  | 0.9947252 |

Table S6: Variant calling accuracy on rare (allele frequency  $\leq 0.01$ ) variants.

Dataset: HG003 35x WGS

| Type  | Caller         | False negatives | False positives | Recall   | Precision | F1 score  |
|-------|----------------|-----------------|-----------------|----------|-----------|-----------|
| INDEL | DeepVariant-AF | 949             | 207             | 0.919583 | 0.983799  | 0.9506077 |
|       | DeepVariant    | 866             | 306             | 0.926616 | 0.976500  | 0.9509042 |
|       | GATK           | 635             | 2221            | 0.946191 | 0.859350  | 0.9006821 |
|       | Strelka2       | 998             | 1059            | 0.915431 | 0.925794  | 0.9205833 |
| SNP   | DeepVariant-AF | 4033            | 678             | 0.943084 | 0.992656  | 0.9672353 |
|       | DeepVariant    | 3876            | 1750            | 0.945300 | 0.981345  | 0.9629853 |
|       | GATK           | 3980            | 25226           | 0.943832 | 0.784869  | 0.8570418 |
|       | Strelka2       | 4338            | 3079            | 0.938780 | 0.967704  | 0.9530226 |

Table S7: Software used in the experiments

|                            |          |
|----------------------------|----------|
| DeepVariant <sup>6</sup>   | 1.1      |
| GATK <sup>7</sup>          | 4.2.0.0  |
| Octopus <sup>8</sup>       | 0.7.2    |
| Strelka2 <sup>9</sup>      | 2.9.2    |
| GNU Parallel <sup>10</sup> | 20200322 |

## Supplementary Figures

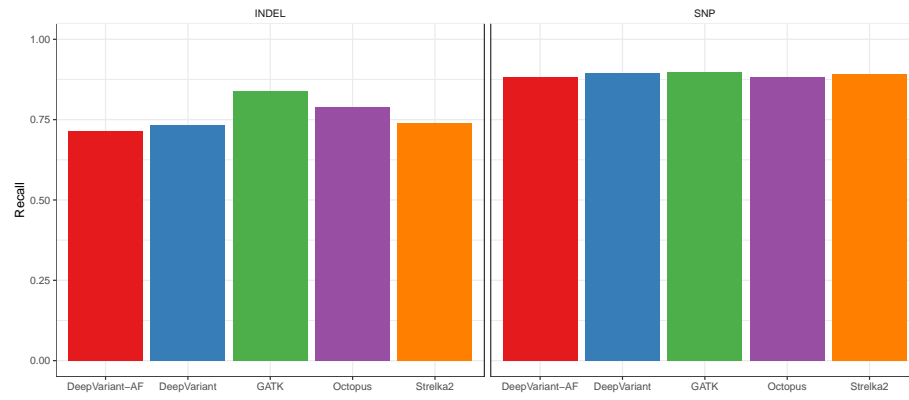

Figure S1: Recall for HG003 GIAB v4.2.1 variants that have zero allele frequency in the 1000 Genomes Project

## References

1. Krusche, P., Trigg, L., Boutros, P. C., Mason, C. E., Francisco, M., Moore, B. L., Gonzalez-Porta, M., Eberle, M. A., Tezak, Z., Lababidi, S., *et al.* Best practices for benchmarking germline small-variant calls in human genomes. *Nature biotechnology* **37**, 555–560 (2019).
2. Olson, N. D., Wagner, J., McDaniel, J., Stephens, S. H., Westreich, S. T., Prasanna, A. G., Johanson, E., Boja, E., Maier, E. J., Serang, O., *et al.* precisionFDA Truth Challenge V2: Calling variants from short-and long-reads in difficult-to-map regions. *bioRxiv* (2020).
3. Ebert, P., Audano, P. A., Zhu, Q., Rodriguez-Martin, B., Porubsky, D., Bonder, M. J., Sulovari, A., Ebler, J., Zhou, W., Mari, R. S., *et al.* Haplotype-resolved diverse human genomes and integrated analysis of structural variation. *Science* **372** (2021).
4. De Coster, W., Weissensteiner, M. H. & Sedlazeck, F. J. Towards population-scale long-read sequencing. *Nature Reviews Genetics*, 1–16 (2021).
5. Beyter, D., Ingimundardottir, H., Oddsson, A., Eggertsson, H. P., Bjornsson, E., Jonsson, H., Atlason, B. A., Kristmundsdottir, S., Mehninger, S., Hardarson, M. T., *et al.* Long-read sequencing of 3,622 Icelanders provides insight into the role of structural variants in human diseases and other traits. *Nature Genetics* **53**, 779–786 (2021).
6. Poplin, R., Chang, P.-C., Alexander, D., Schwartz, S., Colthurst, T., Ku, A., Newburger, D., Dijamco, J., Nguyen, N., Afshar, P. T., *et al.* A universal SNP and small-indel variant caller using deep neural networks. *Nature biotechnology* **36**, 983–987 (2018).
7. Van der Auwera, G. A. & O’Connor, B. D. *Genomics in the Cloud: Using Docker, GATK, and WDL in Terra* (O’Reilly Media, 2020).
8. Cooke, D. P., Wedge, D. C. & Lunter, G. A unified haplotype-based method for accurate and comprehensive variant calling. *Nature biotechnology*, 1–8 (2021).
9. Kim, S., Scheffler, K., Halpern, A. L., Bekritsky, M. A., Noh, E., Källberg, M., Chen, X., Kim, Y., Beyter, D., Krusche, P., *et al.* Strelka2: fast and accurate calling of germline and somatic variants. *Nature methods* **15**, 591–594 (2018).
10. Tange, O. *GNU Parallel 2018* ISBN: 9781387509881. <https://doi.org/10.5281/zenodo.1146014> (Ole Tange, Mar. 2018).
